# Supplementary material for: Recurrences and Macular Complications after Perfluorocarbon-Liquid-Free Vitrectomy for Primary Rhegmatogenous Retinal Detachment
Source: Springer Nature journal article supplement (doi:10.1007/s40123-023-00811-z), 2023-09-29
Supplement: MOESM1 [file 26104748]

## Supplementary Materials

### **RECURRENCES AND MACULAR COMPLICATIONS AFTER PERFLUOROCARBON-LIQUID-FREE VITRECTOMY FOR PRIMARY RHEGMATOGENOUS RETINAL DETACHMENT**

Maria Vittoria Cicinelli, MD,<sup>1,2,3</sup> Eleonora Benatti, MD,<sup>1</sup> Vincenzo Starace, MD,<sup>1</sup> Francesco Nadin, MD,<sup>1,2,3</sup> Edoardo di Nisi,<sup>2</sup> Francesco Bandello, MD,<sup>2,3</sup> Michele Coppola, MD<sup>1,2</sup>

1 Ophthalmology Unit, Azienda Ospedaliera di Monza, Monza, Italy

2 School of Medicine, Vita-Salute San Raffaele University, Milan, Italy

3 Department of Ophthalmology, IRCCS San Raffaele Scientific Institute, Milan, Italy

#### **Correspondence to:**

Maria Vittoria Cicinelli, MD,

Orcid ID 0000-0003-2938-0409

Department of Ophthalmology, IRCCS San Raffaele Scientific Institute, Via Olgettina 60, Milan, 20132, Italy

Tel: +390226433512, Fax: +390226433643

Email: cicinelli.mariavittoria@hsr.it

**Supplementary Table 1.** Demographic and clinical characteristics of patients divided according to the presence of cystoid macular edema (CME) after pars plana vitrectomy (PPV) for rhegmatogenous retinal detachment (RRD).

|                       | <b>CME<br/>(n=36)</b> | <b>No CME<br/>(n=310)</b> | <b>P-value</b> |
|-----------------------|-----------------------|---------------------------|----------------|
| Age (years)           | 61.9±10.7             | 57.7±10.6                 | 0.02*          |
| Gender (%)            |                       |                           |                |
| • Male                | 28 (78)               | 207 (67)                  | 0.2            |
| • Female              | 8 (22)                | 103 (33)                  |                |
| Refraction (diopters) | -4.95±4.94            | -4.57±4.00                | 0.7            |
| Pseudophakia (%)      | 9 (25)                | 71 (23)                   | 0.9            |
| Combined FACO+PPV (%) | 12 (33)               | 91 (29)                   | 0.6            |
| Surgery time (min.)   |                       |                           |                |
| • PPV                 | 41.7±9.3              | 44.9±13.9                 | 0.3            |
| • FACO+PPV            | 58.5±16.4             | 58.2±16.7                 | 0.9            |
| Gauge (%)             |                       |                           |                |
| • 23                  | 2 (6)                 | 13 (4)                    | >0.5           |
| • 25                  | 34 (94)               | 296 (95)                  |                |
| • 27                  | 0 (0)                 | 1 (0)                     |                |
| Macula-off (%)        | 13 (36)               | 77 (25)                   | 0.2            |
| Multiple tears (%)    | 11 (31)               | 125 (40)                  | 0.6            |
| Tear location (%)     |                       |                           |                |
| • Superior            | 11 (31)               | 140 (45)                  | 0.04*          |
| • Nasal/temporal      | 9 (25)                | 68 (22)                   |                |
| • Inferior            | 13 (36)               | 92 (30)                   |                |
| • Posterior           | 3 (8)                 | 5 (2)                     |                |
| • Not found           | 0 (0)                 | 5 (2)                     |                |
| Giant tear (%)        | 3 (8)                 | 12 (4)                    | 0.5            |
| PVR pre (%)           |                       |                           |                |
| • Grade A             | 3 (8)                 | 10 (3)                    | <0.001*        |
| • Grade B-D           | 6 (17)                | 9 (3)                     |                |
| Tamponade agent (%)   |                       |                           |                |
| • Gas                 | 30 (83)               | 299 (96)                  | 0.002*         |
| • Silicon oil         | 6 (17)                | 11 (4)                    |                |
| Complicated RRD       | 10 (28)               | 62 (20)                   | 0.3            |
| Recurrent RRD         | 7 (19)                | 8 (3)                     | <0.001*        |

| <b>Postoperative SD-OCT findings</b> |         |        |        |
|--------------------------------------|---------|--------|--------|
| EZ/IZ damage (%)                     | 6 (17)  | 15 (5) | 0.01*  |
| ERM (%)                              | 11 (31) | 21 (7) | 0.003* |
| Macular hole (%)                     | 2 (6)   | 8 (3)  | 0.6    |
| ORF (%)                              | 4 (11)  | 13 (4) | 0.2    |
| Residual subretinal fluid (%)        | 2 (6)   | 12 (4) | 0.9    |

EZ/IZ: ellipsoid zone/interdigitation zone; ERM: epiretinal membrane; FCO phacoemulsification; ORF: outer retinal folds; PVR: proliferative vitreoretinopathy; SD-OCT: spectral-domain optical coherence tomography

P-values refer to linear or logistic regression models having the presence of CME on follow-up as dependent variable.

**Supplementary Table 2.** Demographic and clinical characteristics of patients divided according to the presence of epiretinal membrane (ERM) after pars plana vitrectomy (PPV) for rhegmatogenous retinal detachment (RRD).

|                       | <b>ERM<br/>(n=32)</b> | <b>No ERM<br/>(n=314)</b> | <b>P-value</b> |
|-----------------------|-----------------------|---------------------------|----------------|
| Age (years)           | 59.9±7.9              | 57.4±10.4                 | 0.1            |
| Gender (%)            |                       |                           | 0.9            |
| • Male                | 22 (69)               | 213 (68)                  |                |
| • Female              | 10 (31)               | 101 (32)                  |                |
| Refraction (diopters) | -4.18±4.58            | -4.67±4.06                | 0.7            |
| Pseudophakia (%)      | 10 (31)               | 70 (22)                   | 0.4            |
| Combined FACO+PPV (%) | 15 (47)               | 88 (28)                   | 0.08           |
| Surgery time (min.)   |                       |                           |                |
| • PPV                 | 42.7±10.5             | 44.2±12.9                 | 0.6            |
| • FACO+PPV            | 51.4±13.4             | 58.4±16.0                 | 0.2            |
| Gauge (%)             |                       |                           | 0.001*         |
| • 23                  | 6 (19)                | 9 (3)                     |                |
| • 25                  | 25 (78)               | 305 (97)                  |                |
| • 27                  | 1 (3)                 | 0 (0)                     |                |
| Macula-off (%)        | 10 (31)               | 80 (25)                   | 0.8            |
| Multiple tears (%)    | 17 (53)               | 119 (38)                  | 0.09           |
| Tear location (%)     |                       |                           | 0.9            |
| • Superior            | 16 (50)               | 135 (43)                  |                |
| • Nasal/temporal      | 6 (19)                | 71 (23)                   |                |
| • Inferior            | 9 (28)                | 96 (31)                   |                |
| • Posterior           | 0 (0)                 | 8 (2)                     |                |
| • Not found           | 1 (3)                 | 4 (1)                     |                |
| Giant tear (%)        | 4 (13)                | 11 (4)                    | 0.02*          |
| PVR pre (%)           |                       |                           |                |
| • Grade A             | 1 (3)                 | 12 (4)                    | 0.2            |
| • Grade B-D           | 4 (13)                | 11 (4)                    | 0.03*          |
| Tamponade agent (%)   |                       |                           | 0.9            |
| • Gas                 | 32 (100)              | 297 (95)                  |                |
| • Silicon oil         | 0 (0)                 | 17 (5)                    |                |
| Complicated RRD       | 10 (31)               | 62 (20)                   | 0.5            |

|                                      |         |        |        |
|--------------------------------------|---------|--------|--------|
| Recurrent RRD                        | 3 (9)   | 12 (4) | 0.5    |
| <b>Postoperative SD-OCT findings</b> |         |        |        |
| EZ/IZ damage (%)                     | 4 (13)  | 17 (5) | 0.7    |
| CME (%)                              | 12 (38) | 24 (8) | 0.002* |
| Macular hole (%)                     | 2 (6)   | 8 (3)  | 0.4    |
| ORF (%)                              | 6 (19)  | 11 (6) | 0.02*  |
| Residual subretinal fluid (%)        | 1 (3)   | 13 (7) | 0.7    |

CME: cystoid macular edema; EZ/IZ: ellipsoid zone/interdigitation zone; FCO phacoemulsification; ORF: outer retinal folds; PVR: proliferative vitreoretinopathy; SD-OCT: spectral-domain optical coherence tomography

P-values refer to linear or logistic regression models having the presence of ERM on follow-up as dependent variable.

**Supplementary Table 3.** Demographic and clinical characteristics of patients divided according to the presence of persistent ellipsoid zone (EZ)/interdigitation zone (IZ) damage after pars plana vitrectomy (PPV) for rhegmatogenous retinal detachment (RRD).

|                       | <b>EZ/IZ damage<br/>(n=21)</b> | <b>No EZ/IZ damage<br/>(n=325)</b> | <b>P-value</b> |
|-----------------------|--------------------------------|------------------------------------|----------------|
| Age (years)           | 61.6±10.1                      | 57.9±10.6                          | 0.2            |
| Gender (%)            |                                |                                    | 0.9            |
| • Male                | 15 (71)                        | 220 (68)                           |                |
| • Female              | 6 (29)                         | 105 (32)                           |                |
| Refraction (diopters) | -3.84±2.29                     | -4.67±4.21                         | 0.3            |
| Pseudophakia (%)      | 10 (48)                        | 70 (22)                            | 0.7            |
| Combined FACO+PPV (%) | 6 (29)                         | 97 (30)                            | 0.9            |
| Surgery time (min.)   |                                |                                    |                |
| • PPV                 | 45.9±16.6                      | 44.5±13.2                          | 0.7            |
| • FACO+PPV            | 50.0±18.7                      | 58.8±16.4                          | 0.3            |
| Gauge (%)             |                                |                                    | 0.9            |
| • 23                  | 0 (0)                          | 15 (5)                             |                |
| • 25                  | 21 (100)                       | 309 (95)                           |                |
| • 27                  | 0                              | 1 (0)                              |                |
| Macula-off (%)        | 6 (29)                         | 84 (26)                            | 0.8            |
| Multiple tears (%)    | 8 (38)                         | 128 (39)                           | 0.9            |
| Tear location (%)     |                                |                                    | 0.9            |
| • Superior            | 9 (43)                         | 142 (44)                           |                |
| • Nasal/temporal      | 3 (14)                         | 74 (23)                            |                |
| • Inferior            | 8 (38)                         | 97 (30)                            |                |
| • Posterior           | 1 (5)                          | 7 (2)                              |                |
| • Not found           | 0 (0)                          | 5 (2)                              |                |
| Giant tear (%)        | 1 (5)                          | 14 (4)                             | 0.7            |
| PVR pre (%)           |                                |                                    | 0.03*          |
| • Grade A             | 3 (14)                         | 10 (3)                             |                |
| • Grade B-D           | 1 (5)                          | 14 (4)                             |                |
| Tamponade agent (%)   |                                |                                    | 0.05*          |
| • Gas                 | 18 (86)                        | 311 (96)                           |                |
| • Silicon oil         | 3 (14)                         | 14 (4)                             |                |
| Complicated RRD       | 4 (19)                         | 68 (21)                            | 0.8            |

|                                      |        |        |       |
|--------------------------------------|--------|--------|-------|
| Recurrent RRD                        | 2 (10) | 13 (4) | 0.2   |
| <b>Postoperative SD-OCT findings</b> |        |        |       |
| CME (%)                              | 6 (29) | 30 (9) | 0.01* |
| ERM (%)                              | 4 (19) | 28 (9) | 0.5   |
| Macular hole (%)                     | 2 (10) | 8 (2)  | 0.1   |
| ORF (%)                              | 2 (10) | 15 (5) | 0.3   |
| Residual subretinal fluid (%)        | 0 (0)  | 14 (4) | 0.9   |

CME: cystoid macular edema; ERM: epiretinal membrane; FCO phacoemulsification; ORF: outer retinal folds; PVR: proliferative vitreoretinopathy; SD-OCT: spectral-domain optical coherence tomography

P-values refer to linear or logistic regression models having the presence of EZ/IZ on follow-up as dependent variable.
